# Supplementary material for: Mycobacterium tuberculosis Lipolytic Enzymes as Potential Biomarkers for the Diagnosis of Active Tuberculosis
Source: PubMed Central journal article supplement (PMC3178603; doi:10.1371/journal.pone.0025078), 2011-09-22
Supplement: pone.0025078.s002.pdf [file pone.0025078.s002.pdf]

**Table S1.** Relative specificity and sensitivity of the IgG detection against combination of *M. tuberculosis* antigens.

| Subjects group                  | Rv3452 and LipY       | Rv3452 and Rv0183     | Rv3452 and Rv1984c    | All four antigens     |
|---------------------------------|-----------------------|-----------------------|-----------------------|-----------------------|
| <b>Specificity (%) (95% CI)</b> |                       |                       |                       |                       |
| <b>Total control (149)</b>      | 91.9 (92.0 to 95.8)   | 90.6 (84.7 to 94.8)   | 91.3 (85.5 to 95.3)   | 85.2 (78.5 to 90.5)   |
| BCG <sup>+</sup> BD (50)        | 92.0 (80.8 to 97.8)   | 92.0 (80.8 to 97.8)   | 94.0 (83.5 to 98.7)   | 86.0 (73.3 to 94.2)   |
| TB <sup>-</sup> BD (50)         | 94.0 (83.5 to 98.7)   | 92.0 (80.8 to 97.8)   | 92.0 (80.8 to 97.8)   | 92.0 (80.8 to 97.8)   |
| LTBI (49)                       | 89.8 (77.8 to 96.6)   | 87.8 (75.2 to 95.4)   | 87.8 (75.2 to 95.4)   | 71.4 (56.7 to 83.4)   |
| <b>Sensitivity (%) (95% CI)</b> |                       |                       |                       |                       |
| <b>Total TB (105)</b>           | 92.4 (85.5 to 96.7)   | 92.7 (86.1 to 96.8)   | 92.7 (86.1 to 96.8)   | 93.3 (86.8 to 97.3)   |
| Polish TB (62)                  | 98.4 (91.3 to 100.00) | 100.0 (96.7 to 100.0) | 100.0 (96.7 to 100.0) | 100.0 (96.7 to 100.0) |
| French TB (43)                  | 83.7 (69.3 to 93.2)   | 81.4 (66.6 to 91.6)   | 81.4 (66.6 to 91.6)   | 83.7 (69.3 to 93.2)   |

n: number of subjects; BCG<sup>+</sup> BD: BCG vaccinated blood donors, TB<sup>-</sup> HP: non-tuberculosis hospitalized patients, TB: *tuberculosis* patients, LTBI: latent *tuberculosis* infection
